# Supplementary material for: Strengthening research capacity: a systematic review of manuscript writing and publishing interventions for researchers in low-income and middle-income countries
Source: PubMed Central journal article supplement — BMJ Glob Health. 2022 Feb 14;7(2):e008059. doi: 10.1136/bmjgh-2021-008059 (PMC8845213; doi:10.1136/bmjgh-2021-008059), 2022-02-14
Supplement: bmjgh-2021-008059supp001.pdf [file bmjgh-2021-008059supp001.pdf]

## Appendix

### Search Strategies

All searches were run from inception of the database to January 27 – 30, as noted. The filters used are identified for each database. The original PubMed search strategy translated and adapted to other databases using <http://sr-accelerator.com/#/polyglot> and the searcher's discretion.

#### Databases

- PubMed (PubMed.gov)
- Embase.com
- Global Health (EBSCOhost)
- Scopus (Elsevier)
- ERIC (ProQuest)

The final strategy used for each database is detailed below.

#### PubMed (27 January 2020)

(developing countries[mh] OR low- and middle-income countries[tiab] OR LMIC\*[tiab] OR Sub-Saharan Africa[tiab] OR Africa[mh] OR South Africa[tiab] OR Rwanda[tiab] OR Kenya[tiab] OR Nigeria[tiab] OR Asia[mh] OR South America[mh] OR Central America[mh]) AND (early career researchers[tiab] OR biomedical research[mh] OR health services research[mh] OR public health research[tiab] OR writing[mh] OR writing[tiab] OR publishing[mh] OR publishing[tiab]) AND (capacity building[mh] OR capacity building[tiab] OR training support[mh] OR training support[tiab]) N = 675

#### Embase (27 January 2020)

1. 'Africa'/exp OR 'Asia'/exp OR 'South America'/exp OR 'Central America'/exp OR 'Mexico'/exp OR 'Pacific Islands'/exp OR 'Sub-Saharan Africa':ab,ti OR 'South Africa'/exp OR 'lmic':ab,ti OR 'low- and middle-income countries':ab,ti OR 'lowest income group'/exp
2. 'medical education'/exp OR 'medical research' OR 'postgraduate education':ab,ti OR 'health sciences academics':ab,ti OR 'university hospital'/exp OR 'health program'/exp
3. 'capacity building'/exp OR 'intersectoral collaboration'/exp OR 'capacity building':ab,ti OR 'cooperation'/exp OR 'research capacity':ab,ti OR 'workload':ab,ti
4. #1 AND #2 AND #3
5. #4 AND ([article]/lim OR [article in press]/lim) N = 1481

#### Global Health (EBSCOhost) (30 January 2020)

1. (SU Africa OR Asia OR South America OR Central America OR Mexico OR TI ( Africa OR Asia OR South America OR Central America OR Mexico OR "Sub-Saharan Africa" OR Rwanda OR Kenya OR Nigeria OR "South Africa" OR "low- and middle-income countries" OR LMIC\* ) OR AB ( Africa OR Asia OR South America OR Central America OR Mexico OR "Sub-Saharan Africa" OR Rwanda OR Kenya OR Nigeria OR "South Africa" OR "low and middle-income countries" OR LMIC\* ))

2. ((medical research OR health services research ) OR TI ( "biomedical research" OR "health services research" OR "public health research" OR "research infrastructure") OR AB ( "biomedical research" OR "health services research" OR "public health research" OR "research infrastructure" ))
3. ((SU ( writing OR training ) OR TI ( "writing skills" OR "training support" OR "capacity building" OR "research capacity" OR "research support") OR AB ("writing skills" OR "training support" OR "capacity building" OR "research capacity" OR "research support"))
4. #1 AND #2 AND #3
5. #4 limited to Academic Journals N = 647

ERIC (ProQuest) (30 January 2020)

(su(developing countries OR global approach) OR ab("developing countries" OR "global approach" OR "low-and middle-income countries" OR LMIC\* OR Africa OR Asia OR "South America" OR "Central America" OR Mexico) OR ti("developing countries" OR "global approach" OR "low-and middle-income countries" OR LMIC\* OR Africa OR Asia OR "South America" OR "Central America" OR Mexico)) AND (su(public health OR medical research) OR ab("public health" OR "health services research" OR "medical research" OR "health care system") OR ti("public health" OR "health services research" OR "medical research" OR "health care system")) AND (su(capacity building OR institutional cooperation) OR ab("research capacity" OR "research capacity building" OR writing OR training) OR ti("research capacity" OR "research capacity building" OR writing OR training)) Limited by: Peer reviewed; Narrowed by: Source type: Scholarly Journals N = 27

Scopus Cited Reference Searching (30 January 2020)

PMIDs: 26055974, 27091342, 27102019, 30064479, 31391948 N = 34
